# Supplementary material for: Characterising vertical turbulent dispersion by observing artificially released SO 2 puffs with UV cameras
Source: Copernicus journal article supplement (doi:10.5194/amt-2018-208), 2018-07-10
Supplement: Supplementary file [file amt-2018-208-AC2-supplement.pdf]

Author comment to referee comment #2 “Interesting and promising technique, too preliminary results” to comments on «Characterising vertical turbulent dispersion by observing artificially released SO<sub>2</sub> puffs with UV cameras”

We thank referee #2 for their thorough review and helpful suggestions. Please find our answers in blue underneath each point raised by the reviewer. Resulting manuscript changes are stated below our answers with changed passages marked in red.

The authors present an interesting new measurement technique with great potential of improving knowledge on turbulent dispersion. That being said, the data set is suboptimal to give a full demonstration of the power of the method (see my second comment below), and I wonder if this paper should be published at this stage, and not after obtaining better data. The analysis feels rather quick and rough, and I would prefer a more in-depth paper, because it is nearly impossible to judge the full quality of the method here. Furthermore, some of the turbulence theory need to be motivated in more detail.

> We agree with the referee that our data set is suboptimal. Nevertheless, we believe that our study is worth publishing, for several reasons.

1) The study presents the measurement instrumentation, the experiment set-up and a proof-of-concept analysis of parts of the data set. All of that is novel and we believe that this is worthy of a publication, as confirmed by the other reviewer. The fact that the analysis of the turbulent dispersion is limited is also the reason why we have submitted this study to Atmos. Meas. Tech. and not to a journal with a scope encompassing the theory of atmospheric turbulence (e.g., Bound. Lay. Met.). However, we agree that the title and abstract might evoke too strong expectations in the reader towards turbulence results. We added a not in the abstract and conclusion to clarify its scope (see manuscript changes below). We have furthermore changed the title to “Observation of turbulent dispersion of artificially released SO<sub>2</sub> puffs with UV cameras” to more clearly emphasize the focus on the observations.

2) The SO<sub>2</sub> retrieval from the image data takes careful analysis and has not been done for discrete SO<sub>2</sub> puffs before. Also the simultaneous recording from different directions and the correction of non-uniform clouds in the background are current research topics. Such information in itself is interesting for researchers applying UV cameras, for example for volcano monitoring.

3) Due to the toxicity of sulfur dioxide (at high concentrations), release experiments have to planned far in advance and in cooperation with local authorities. Furthermore, the military compound that we are allowed to use, is only available for a few weeks in July when the military is not using the site. That means that we cannot easily repeat experiments or extend the

measurement period. In summer 2017, we have also been rather unlucky with the weather conditions during the experiment, which made the analysis of the data very difficult. At the same time, waiting with the publication until better data are obtained would have been unwise, since other researchers are following our work and want to be informed.

> Title: “**Characterising vertical turbulent dispersion by observing** artificially released SO<sub>2</sub> puffs with UV cameras” modified to “**Observation of turbulent dispersion of** artificially released SO<sub>2</sub> puffs with UV cameras”

> Abstract, P1 L14: “In this paper, we present a feasibility study demonstrating that the turbulent dispersion parameters can be retrieved from images of artificially released puffs, **although the presented data set does not allow for an in-depth analysis of the obtained parameters.** ... In principle, the Richardson-Obukhov constant of relative dispersion in the inertial subrange could be also obtained, but the observation time was not sufficiently long in comparison to the source time scale to allow an observation of this dispersion range.”

> Conclusions, P14 L7: “**As a proof-of-concept**, the absolute dispersion, as well as the relative dispersion and meandering of an ensemble of six puffs could be retrieved by performing a reconstruction of the 3D trajectories of the centre of mass positions of instantaneous puff releases.”

Can you also specify what is the specific contribution of all authors to the actual results in the paper? I am not sure after reading the author contributions whether all of those warrant co-authorship of the paper.

> The campaign was a huge group effort and all authors have carried out significant tasks in the design, development, execution and/or analysis of the release experiment and the acquired data set.

We apologize, that we forgot to mention the contribution of Ignacio Pisso at the “author contribution” paragraph. He analysed the optimal positioning of the cameras before the experiment, as well as testing the tomography algorithm with the presented data.

> Autor contributions: ” KS, MC, AK, AS and **IP** contributed with discussion to the manuscript. **IP modelled the optimal setup of the UV cameras.**”

Specific comments:

P2, L7: What do you mean with the PDF has large fluctuations? Do you mean that the flow has large fluctuations, resulting in a wide PDF?

> We meant that the scalar field exhibits large fluctuations. We clarified the phrase.

> P2 L6: “A substance (a “passive scalar”) injected into a turbulent atmospheric flow exhibits complex dynamical behaviour. Its distribution is **stochastic**, and the probability density function (PDF) of the scalar

concentration field exhibits **the signature of** large fluctuations, **and** can depart substantially from Gaussian behaviour (**e.g.** Shraiman and Siggia, 2000)."

P2, L10: Your statement on direct numerical simulation is not correct. In order to produce meaningful DNS, it is not necessary to reach similar Reynolds numbers as in the atmosphere. Many of the statistics of the flow converge with Reynolds numbers far below those in the atmosphere, as can for instance be seen in van Heerwaarden & Mellado (2016, JAS), who show converging statistics in DNS a convective boundary layer. I consider the authors to have a look at the seminal paper of Moin and Mahesh (1998) and the appropriate interpretation of DNS as a research tool.

> Our sentence (P2, L10) "The direct numerical simulation of turbulence (Orszag and Patterson, 1972) is not feasible at Reynolds numbers typical for the atmospheric boundary layer (ABL), and ..." is actually true and correct, i.e. DNS is not feasible at Reynolds numbers typical of the ABL. However, we agree with the reviewer that DNS is useful also at lower Reynolds numbers as some turbulence statistics converge at relatively low Reynolds number.

The reviewer mentions the work of van Heerwaarden & Mellado (2016) that observe convergence of some Eulerian statistics up to second order at Taylor microscale Reynolds numbers between 150 and 180.

However, the use of DNS for studying scalar dispersion statistics and the Richardson regime in particular, is not straightforward and requires further clarification. The first thing to note is that Lagrangian dispersion statistics converge slowly with Reynolds number compared to Eulerian statistics. Yeung (2002) notes that the ratio of Lagrangian integral time scale to Kolmogorov time scale grows much slower with Reynolds number than any ratios of Eulerian length scales or timescales. Yeung et al. (2006) underline that if an inertial subrange exists in Lagrangian statistics it requires a higher Reynolds number to be clearly observed than in Eulerian statistics of similar order. Yeung et al. (2006) perform DNS simulations in the Taylor microscale Reynolds number range 40 to 650 and note that the Reynolds numbers in their data are still not sufficient to produce a fully unambiguous scaling range. Moreover, relative dispersion must ensure a sufficient range of scale between the source length and time scales and the integral scales that further increase the necessary extension of the inertial range and therefore the Reynolds number requirements. For example, the laboratory experiments of Ouellette et al. (2006) at Taylor microscale Reynolds number of 815 seems to have an insufficient Reynolds number, given the initial particle separation, to be able to observe the Richardson regime. Concluding, we think that our statement is correct but to avoid misinterpretation we extended it.

> P2 L9: "The direct numerical simulation of turbulence (**DNS, e.g.** Orszag and Patterson, 1972) is not feasible at Reynolds numbers typical for the atmospheric boundary layer (ABL). **Although some Eulerian turbulence properties seem to converge also at relatively low Reynolds number (e.g. van**

Heerwaarden & Mellado, 2016; Dimotakis, 2000), the Lagrangian dispersion statistics in general, and the relative dispersion in particular, require a high Reynolds number to converge and this poses challenges to both DNS and laboratory observations (e.g. Yeung, 2001; Yeung et al., 2006; Oluette et al., 2006). Other models used for tracer dispersion (e.g., Large Eddy Simulation or Lagrangian particle models) require parametrisations and/or validation based on atmospheric observations (e.g., Hanna 1984; Arya, 1999)."

P3, L23-30: I get a little uncomfortable from this paragraph. Not all equipment was operational yet, your dataset contains a too small number of puffs for meaningful statistics, and later in the paper (P4 L8) you also refer to sub-optimal weather conditions. Why did you choose to publish this paper now, and not after you have obtained better data? As the method is so promising, why wouldn't you wait?

> Please see the answer to the main comment above.

P6, eq 4: This theory only applies if the puffs have length scales far less than the production scales of the flow, as well as the dissipation scale. Can you give those numbers for the flow your experiment is embedded in?

> For Eq. (4) to be applicable (see also e.g. Monin and Yaglom, 1975, page 543, eq. 24.30') it is necessary that the initial source size is larger than the Kolmogorov length scale and smaller than the length scale of (local) energy containing eddies (i.e. source size is in the inertial subrange). Moreover, the time after release must be smaller than the characteristic time scale of the source,  $t_s$ , as already reported in the manuscript. Therefore, we are assuming here that the reviewer is interested in knowing if the initial source size is much smaller than local energetic eddies. We remind that the source size is estimated to be 0.083 m and the radius of the pipe is 0.0625 m. However, we are not completely sure what are the exact definitions of the length scales mentioned by the reviewer. We report here the definitions of the length scales that we are considering, according to our understanding:

- Local dissipation length scale based on vertical velocity:

$$l_\varepsilon = \sigma_w^3(z_s) / \varepsilon(z_s) = 10.2 \text{ m}$$

- Production length scale:  $l_p = kz_s = 3.48 \text{ m}$

Where  $z_s$  (=8.7 m) is the source elevation. These are much larger than the initial puff size. We also estimated a local Eulerian integral time scale for the vertical velocity of about 3 s (see Table 2 in the manuscript). This corresponds to a length scale of about 15 m using Taylor's hypothesis. In any case, for Eq. (4) to be valid, it is most important that the turbulent spectrum shows an inertial range and that this range extends to scales much larger than the puff size (here between source size and 2 m). We examined the vertical velocity spectrum and found that the inertial range starts from a wavenumber corresponding to a length scale of about 9 m. Future experiments will use a

much higher source elevation, so that the length scales are larger to ensure a more extended inertial subrange.

We changed the structure of the manuscript to stress beforehand that the presented Eq. (4)-(6) are only valid for the inertial subrange.

> P6 L11: “For an initial particle separation (puff size) in the inertial subrange of turbulence, i.e. larger than the Kolmogorov length scale and smaller than the length scale of (local) energy containing eddies, the particle separation will be first influenced by the source size and then become independent of the initial separation (e.g Monin and Yaglom, 1975; Franzese and Cassiani, 2007 Eq. A1-A6). Based on inertial range scaling arguments (e.g Monin and Yaglom, 1975), the characteristic time scale of the source is given by  $t_s = (r_0^2/\epsilon)^{1/3}$ , where  $\epsilon$  is the mean dissipation of turbulent kinetic energy. The following Eq. (4)-(6) are valid for puff sizes in the inertial subrange of turbulence, which was observed in our experiment (see appendix A3 for details)”.

P6, eq 5: Is the turbulence isotropic at the scales you are looking? Are the variances of the three flow components on the time scale of dispersion the same?

> At the scales that we are considering (see also answer to the point above), we observe a well-developed inertial subrange,  $k^{-5/3}$ , for all the three velocity components. The reviewer should note that we used isotropic arguments to estimate energy dissipation from the energy spectra and the estimates using different velocity components have maximum differences limited to about 30%. We think that this justify the use of local isotropic turbulence scaling arguments.

> Appendix A3, P16 L2: “The energy spectrum  $E_i(k)$  of the  $i^{th}$  velocity component, where  $k$  is the wavenumber, is the Fourier transform of the autocorrelation function of that velocity component and was calculated according to e.g. Stull (1988, p.312) and using Taylor’s hypothesis ....”

> Appendix A3, P16 L13: “The mean dissipation of turbulent kinetic energy  $\epsilon$  was obtained by fitting a Kolmogorov spectrum  $E(k) = C_k \epsilon^{2/3} k^{-5/3}$  to the inertial range of the measured spectrum for the along-wind component of velocity using the method discussed in detail by Stull (1988). The value of the Kolmogorov constant  $C_k=0.49$  was taken according to measurements and theory of homogeneous isotropic turbulence (e.g. Stull, 1988; Pope 2000). We observe a well-developed inertial subrange starting at a length scale of about 9 m and the differences between estimates of  $\epsilon$  based on the three different velocity components are limited to about 30%.”

P12, L29-31: What is the exact interpretation of the  $t^2$  and  $t^3$  regime. You could make the link with eqs 4-6, and explain the physical meaning better.

> Both regimes describe the relative dispersion for length scales in the inertial subrange of turbulence. In the inertial subrange, turbulent energy is neither produced nor destroyed and the energy distribution over the length scales can be described by a Kolmogorov energy spectrum (see appendix A3). For these scales, the puff size first ( $t \ll t_s$ ) depends on the initial puff size at the release time and increases proportional to  $t^2$  ( $t^2$  regime, Eq. (4)&(5)). For larger times after the release ( $t \gg t_s$ ), the increase of the puff size becomes independent of the initial size and increases proportional to  $t^3$  ( $t^3$  regime, Eq.(6)). We extended the manuscript to clarify this point.

> P6 L18: "Batchelor (1952) showed that for  $t \ll t_s$  the spread of a puff, or cluster of particles, is dominated by the initial velocity differences between the particles ("ballistic regime") ... "

> P6 L27: "For larger times  $t \gg t_s$ , the rate of change of particle separation becomes independent of the initial separation, and the spread of the puff is proportional to the Richardson-Obukhov constant  $C_r$  according to the Richardson-Obukhov scaling (e.g. Monin and Yaglom, 1975) ..."

Figures: Please make the figures such that they all have a consistent, and readable font size.

> Figures 11-14 have been replaced.

## Additional references

Dimotakis, P.E., 2000. The mixing transition in turbulent flows. *Journal of Fluid Mechanics*, 409, pp.69–98.

van Heerwaarden, C.C. & Mellado, J.P., 2016. Growth and Decay of a Convective Boundary Layer over a Surface with a Constant Temperature. *Journal of the Atmospheric Sciences*, 73(5), pp.2165–2177. Available at: <http://journals.ametsoc.org/doi/10.1175/JAS-D-15-0315.1>.

Ouellette, N.T. et al., 2006. An experimental study of turbulent relative dispersion models. *New Journal of Physics*, 8.

Yeung, P.K., 2002. Lagrangian Investigations of Turbulence. *Ann. Rev. Fluid Mech.*, 34, pp.115–142.

Yeung, P.K., Pope, S.B. & Sawford, B.L., 2006. Reynolds number dependence of Lagrangian statistics in large numerical simulations of isotropic turbulence. *Journal of Turbulence*, 7, pp.1–12.
